# Supplementary material for: Permafrost distribution modelling in the semi-arid Chilean Andes
Source: Copernicus journal article supplement (doi:10.5194/tc-11-877-2017), 2017-04-06
Supplement: Supplementary file 1 [file tc-11-877-2017-supplement.pdf]

Supplement of The Cryosphere, 11, 877–890, 2017  
<http://www.the-cryosphere.net/11/877/2017/>  
doi:10.5194/tc-11-877-2017-supplement  
© Author(s) 2017. CC Attribution 3.0 License.

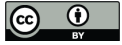

*Supplement of*

## **Permafrost distribution modelling in the semi-arid Chilean Andes**

**Guillermo F. Azócar et al.**

*Correspondence to:* Alexander Brenning ([alexander.brenning@uni-jena.de](mailto:alexander.brenning@uni-jena.de))

The copyright of individual parts of the supplement might differ from the CC-BY 3.0 licence.

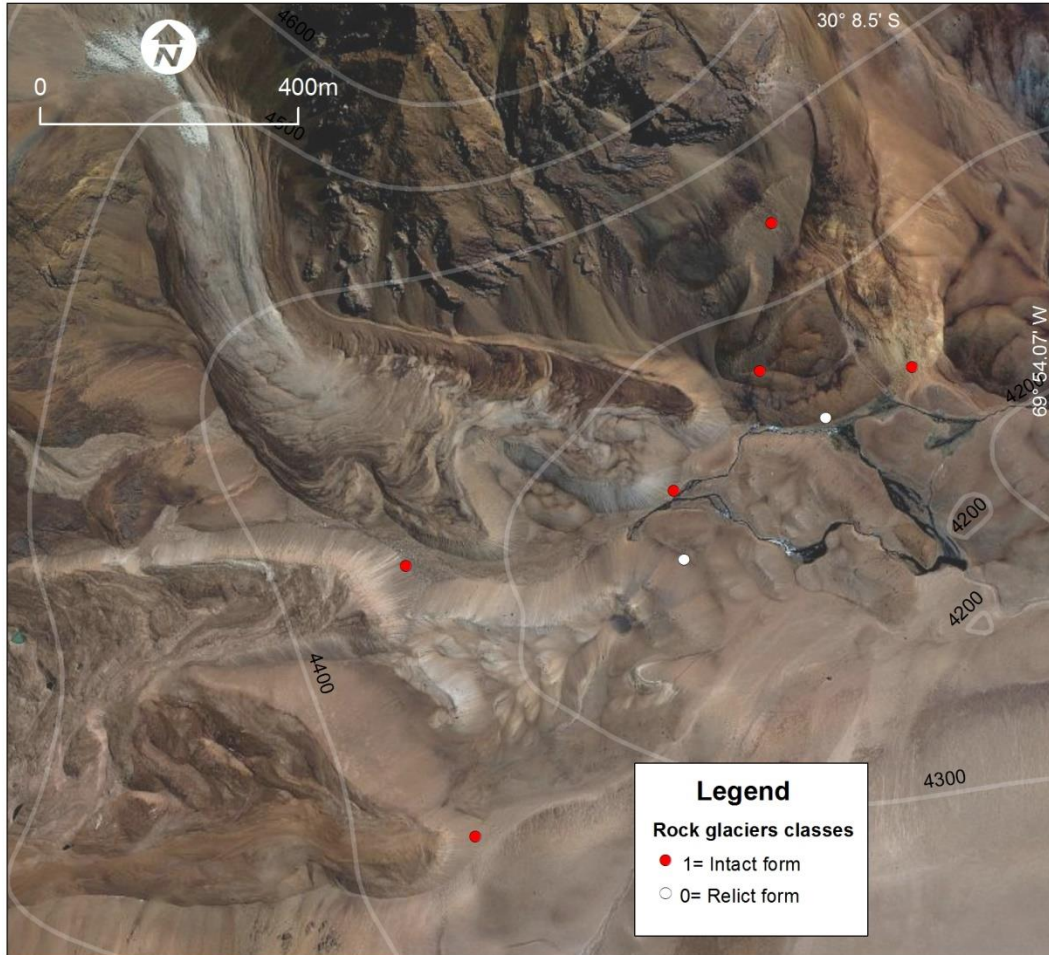

**Figure S1: Examples of rock glaciers classified as intact (i.e. active or inactive) and relict on the southeast side of Cerro Tapado, Chile.**
